# Supplementary material for: Exploitation of mussel byssus mariculture waste as a water remediation material
Source: Royal Society of Chemistry journal article supplement (doi:10.1039/c7ra06664c), 2017-01-01
Supplement: c7ra06664c1.pdf [file c7ra06664c1.pdf]

## Supporting Information

### Exploitation of seafood waste byssus as water remediation material

*Devis Montroni<sup>1</sup>, Corrado Piccinetti<sup>2</sup>, Simona Fermani<sup>1</sup>, Matteo Calvaresi<sup>1</sup>, Matthew J. Harrington<sup>2</sup>, Giuseppe Falini<sup>1,\*</sup>*

<sup>1</sup> Dipartimento di Chimica “Giacomo Ciamician”, Alma Mater Studiorum Università di Bologna, via Selmi 2, 40126 Bologna, Italy

<sup>2</sup> Laboratory of Fisheries and Marine Biology, University of Bologna, viale Adriatico 1/N, I-61032, Fano (PU), Italy

<sup>3</sup> Dept. of Biomaterials, Max-Planck Institute for Colloids and Interfaces, Research Campus Golm, Potsdam 14424, Germany

|                      |      |     |
|----------------------|------|-----|
| Figure SI1           | page | SI2 |
| Figure SI2           | page | SI2 |
| Adsorption isotherms | page | SI3 |
| Figure SI3           | page | SI3 |
| Figure SI4           | page | SI4 |
| Figure SI5           | page | SI4 |

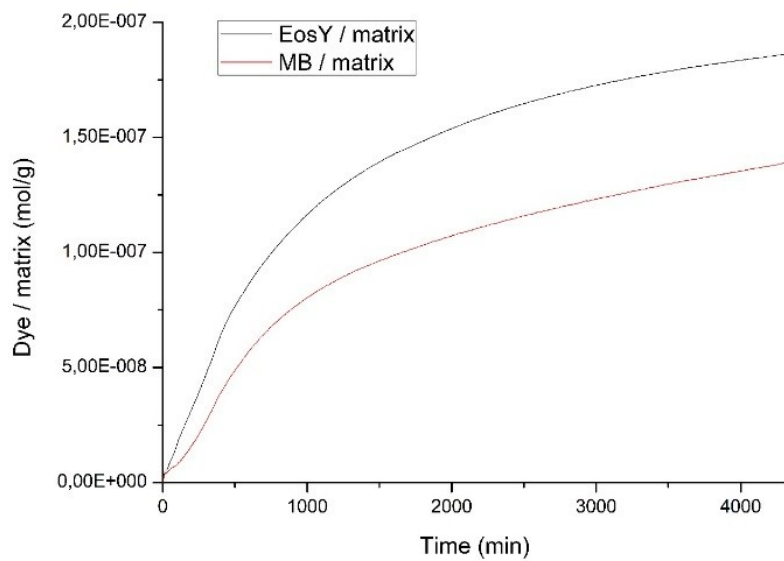

Figure SI1. Adsorption kinetic of the de-metaled byssus in a 0.01 mM solution of dye.

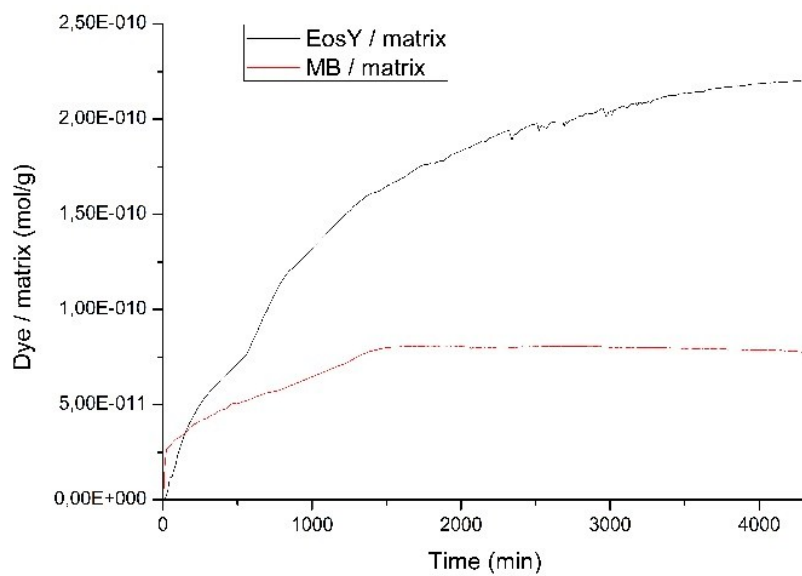

Figure SI2. Adsorption kinetic of the pristine byssus in a 0.01 mM solution of dye.

## Adsorption Isotherms

The experimental data were fitted using three adsorption isotherm models.

*Langmuir adsorption isotherm:* This describes quantitatively the formation of a monolayer adsorbate on the outer surface of the adsorbent, and after that no further adsorption takes place. Thereby, the Langmuir represents the equilibrium distribution of metal ions between the solid and liquid phases.<sup>i</sup> The Langmuir isotherm is valid for monolayer adsorption onto a surface containing a finite number of identical sites. The model assumes uniform energies of adsorption onto the surface and no transmigration of adsorbate in the plane of the surface.

$$q_e = \frac{q_m b C_e}{1 + b C_e}$$

$$\frac{1}{q_e} = \frac{1}{q_m} + \frac{1}{q_m b C_e}$$

where  $C_e$  is the equilibrium concentration of adsorbate ( $\text{mg L}^{-1}$ );  $q_e$  is the amount of dye adsorbed per gram of the adsorbent at equilibrium ( $\text{mg g}^{-1}$ );  $q_m$  is maximum monolayer coverage capacity ( $\text{mg g}^{-1}$ );  $b$  is Langmuir isotherm constant ( $\text{L mg}^{-1}$ ).

$R_L$  is an important tool in the calculation of the dimensionless equilibrium parameters ( $R_L$ ) that explains the favorability of adsorption process;  $R_L$  is calculated using

$$R_L = \frac{1}{1 + b C_0}$$

where  $C_0$  is the highest initial dye concentration ( $\text{mg L}^{-1}$ )

There are four possibilities for the  $R_L$  value: for favourable sorption  $0 < R_L < 1$ ; for unfavourable sorption  $R_L > 1$ ; for linear sorption  $R_L = 1$ ; for irreversible sorption  $R_L = 0$

*Freundlich adsorption isotherm:* This is commonly used to describe the adsorption characteristics for the heterogeneous surface sites.<sup>ii</sup>

$$q_e = K_F C_e^{1/n}$$

$$\ln q_e = \ln K_F + \frac{1}{n} \ln C_e$$

where  $C_e$  is the equilibrium concentration of adsorbate ( $\text{mg L}^{-1}$ );  $q_e$  is the amount of dye adsorbed per gram of the adsorbent at equilibrium ( $\text{mg g}^{-1}$ );  $n$  is adsorption intensity;  $K_F$  is Freundlich isotherm constant ( $\text{mg g}^{-1}$ ).

The value of  $1/n$  indicates the type of isotherm. If the value of  $1/n$  lies in between ( $0 < 1/n < 1$ ) it showed that isotherm is favorable, if  $1/n = 0$ , it indicates isotherm is irreversible and if  $1/n > 1$ , it is unfavorable.

*Dubinin–Radushkevich isotherm:* Dubinin–Radushkevich (D-R) isotherm is generally applied to express the adsorption mechanism with a Gaussian energy distribution on a heterogenous surface. This model is successfully fitted high solute activities at different concentration ranges. This approach was implied to

distinguish the chemical and physical adsorption. This isotherm is temperature dependent and assumes that there is no homogenous surface on the adsorbent and the equation is expressed as follows.<sup>iii</sup>

$$q_e = q_D e^{-K_D \varepsilon^2}$$

$$\ln q_e = \ln q_D - K_D \varepsilon^2$$

$$\varepsilon = RT \ln(1 + 1/C_e)$$

where  $K_D$  and  $\varepsilon$  are D-R constant ( $\text{mol}^2 \text{kJ}^{-2}$ ) and D-R isotherm constant, respectively;  $R$  and  $T$  are the gas ( $8.314 \times 10^{-3} \text{kJ mol}^{-1} \text{K}^{-1}$ ) and temperature (K) constant, respectively and  $q_D$  is the saturation capacity ( $\text{mg g}^{-1}$ ). The parameters are obtained by the linear plot of  $\ln q_e$  vs.  $\varepsilon^2$ .

$K_D$  is the activity coefficient useful in obtaining the mean sorption energy  $E$  ( $\text{kJ mol}^{-1}$ )

$$E = \sqrt{\frac{1}{2 K_D}}$$

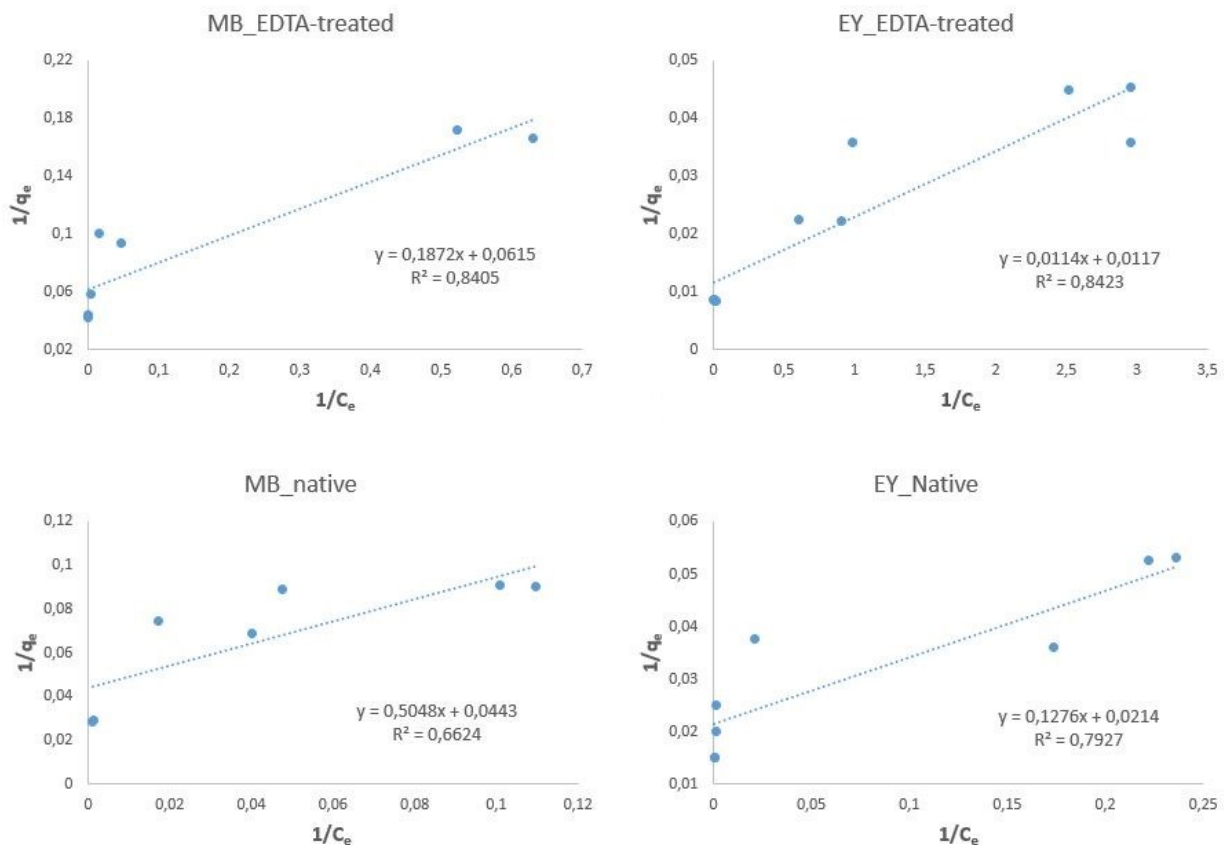

Figure S13. Langmuir adsorption isotherms.

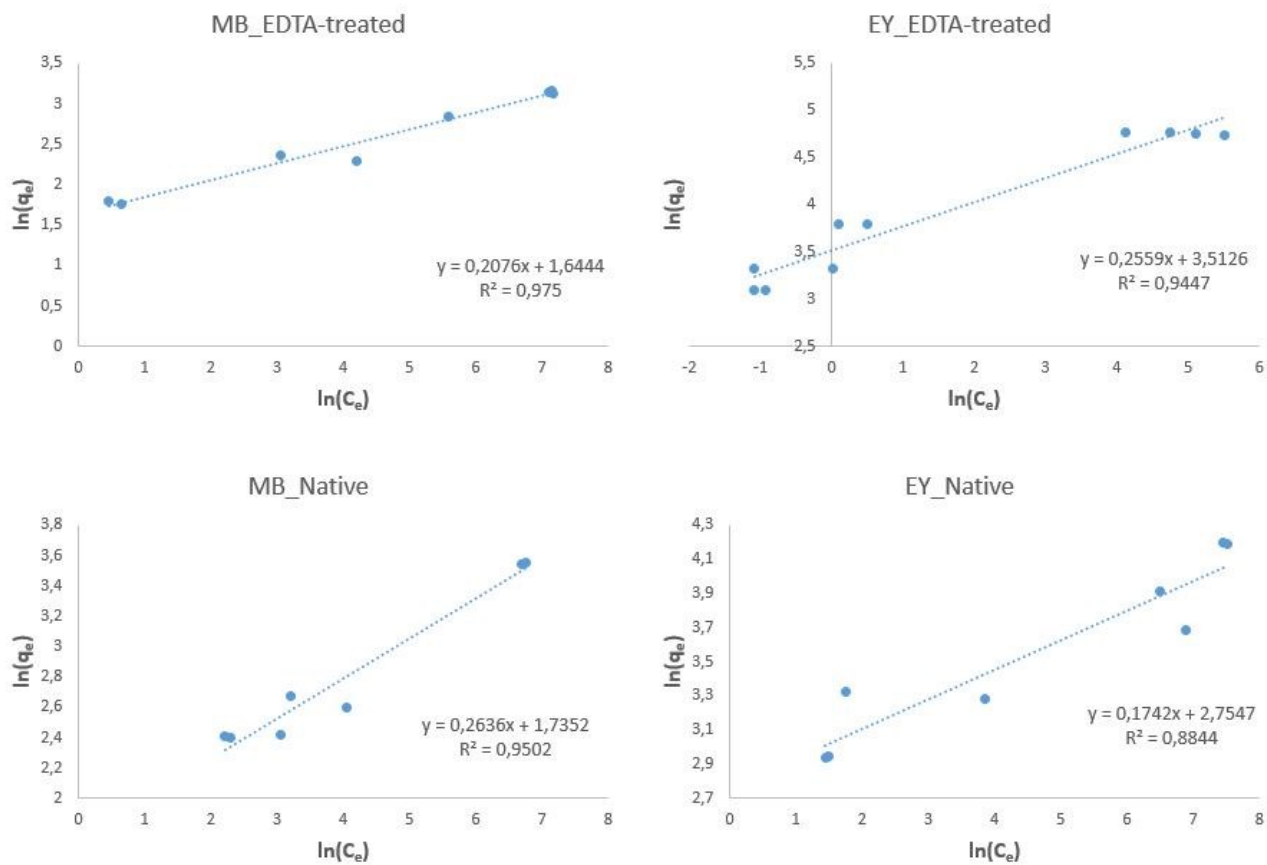

Figure 4SI. Freundlich adsorption isotherms.

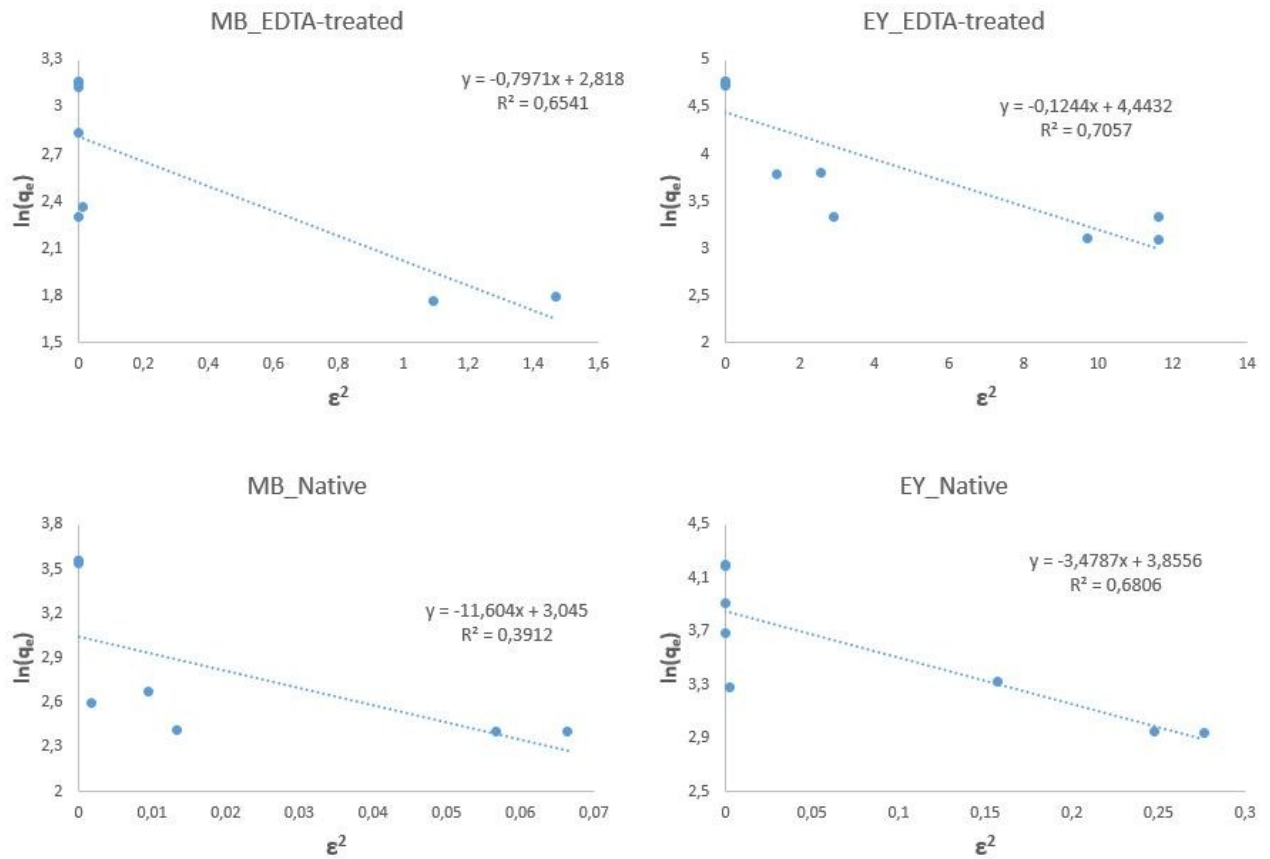

Figure SI5. Dubinin Radushkevich adsorption isotherms

<sup>i</sup> Langmuir, I. The adsorption of gases on plane surfaces of glass, mica and platinum. J. Am. Chem. Soc. 1918, 40, 1361–1403.

<sup>ii</sup> Freundlich, H. M. F. Über die adsorption in losungen. Z. Phys. Chem. 1906, 57, 385–470.

<sup>iii</sup> Dubinin, M. M.; Radushkevich, L. V. Equation of the characteristics curve of activated charcoal. Chem. Zent. 1947, 1, 875.
